# Supplementary material for: A steerable system for the RECoverable Autonomous Sonde (RECAS) to access and study subglacial lakes
Source: Copernicus journal article supplement (doi:10.5194/gi-14-29-2025), 2025-03-05
Supplement: Supplementary file 2 [file gi-14-29-2025-supplement.zip]

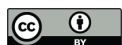

## *Supplement of*

# **A steerable system for the RECoverable Autonomous Sonde (RECAS) to access and study subglacial lakes**

**Mikhail A. Sysoev et al.**

*Correspondence to:* Pavel G. Talalay (ptalalay@yahoo.com) and Da Gong (gongda@jlu.edu.cn)

- gi-14-29-2025-supplement-title-page.pdf
- S1. WINCH CONSTRUCTION.pdf
- S2. PWM GENERATOR.pdf
- S3. POWER MODULE.pdf
- S4. DC-DC CONVERTER.pdf
- S5. ELECTRICAL SCHEMATICS.pdf

The copyright of individual parts of the supplement might differ from the article licence.
