# Supplementary material for: A steerable system for the RECoverable Autonomous Sonde (RECAS) to access and study subglacial lakes
Source: Copernicus journal article supplement (doi:10.5194/gi-14-29-2025), 2025-03-05
Supplement: Supplementary file 5 [file gi-14-29-2025-supplement.zip]

## S5. ELECTRICAL SCHEMATICS

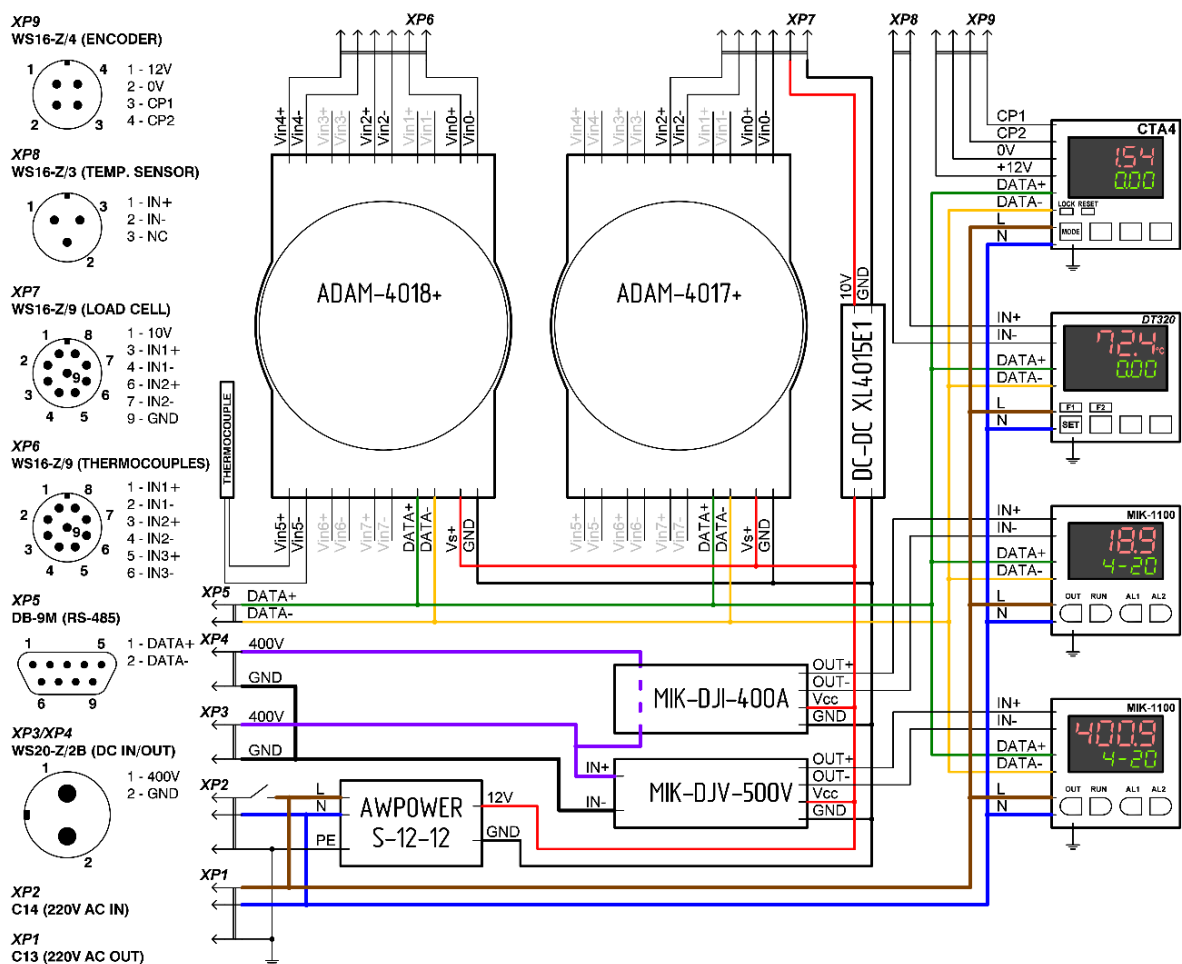

Fig. S18. Electrical schematic of control system

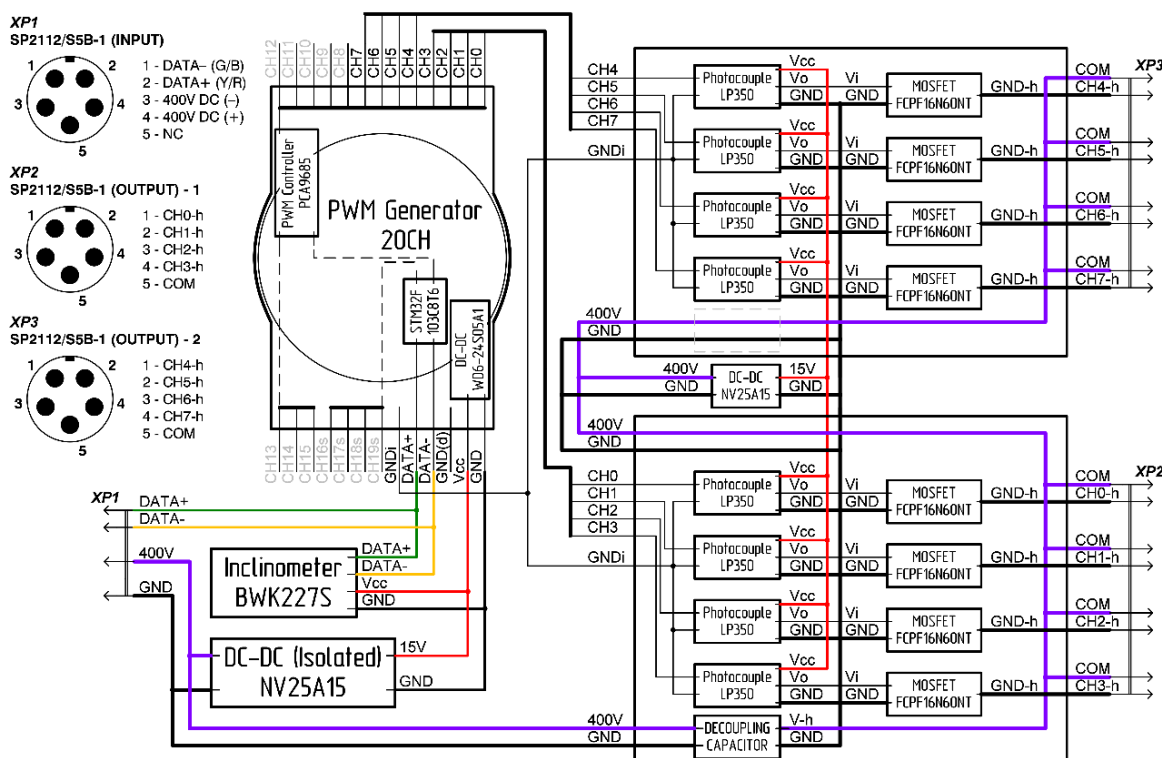

Fig. S19. Electrical schematic of control unit
